# Supplementary material
Source: PubMed Central journal article supplement (PMC6450055)
Supplement: blood843615-suppl1.pdf [file blood843615-suppl1.pdf]

## **Supplemental data**

### **Supplemental Methods**

**Solid-phase binding assay:** Human  $\alpha_{IIb}\beta_3$  (Enzyme Research Laboratories) was coated directly onto a 96-well plate (Thermo Fischer Scientific) at 10  $\mu\text{g/ml}$  in carbonate buffer, pH 9.6, and incubated overnight at 4 °C. Blocking and activation was achieved by incubation in 50 mM Tris pH 7.4, 100 mM NaCl, 1 mM  $\text{CaCl}_2$ , 1 mM  $\text{MgCl}_2$ , 0.0035 % Triton X100, 3 % BSA for 1 h at 37 °C. C4 variants were biotinylated by mixing 100  $\mu\text{l}$  of 100  $\mu\text{M}$  C4 in PBS with 20  $\mu\text{l}$  of biotin reagent (Thermo Scientific, 2.7 mg of NHS-biotin dissolved in 500  $\mu\text{l}$  DMSO), incubated on ice for 2 h, before dialyzing against 20 mM HEPES pH 7.4, NaCl 100 mM for 24 h. Concentration series of 0.078 to 5  $\mu\text{M}$  was obtained by diluting biotinylated C4 variants in Reaction Buffer (50 mM Tris pH 7.4, 100 mM NaCl, 1 mM  $\text{CaCl}_2$ , 1 mM  $\text{MgCl}_2$ , 0.0035 % Triton X100, 1 % BSA), and incubated for 2 h at 37 °C in  $\alpha_{IIb}\beta_3$ -coated wells. The wells were subsequently washed with Reaction Buffer for 3 times 5 min. Binding was probed by incubation with streptavidin horseradish peroxidase conjugate (R&D Systems, 1:2000 dilution in Reaction Buffer) for 20 min at room temperature, before washing with Reaction Buffer for 3 times 5 min. Tetramethylbenzidine substrate kit (Thermo Fisher Scientific) was used to develop the assay, and when the color start to appear after a few minutes, the reaction was quenched by addition of 2 M  $\text{H}_2\text{SO}_4$ . Absorbance at 450 and 570 nm were measured by the Power Wave x340 (Bio-Tek Instruments). Experiments were performed in quadruplets.

**Thermal stability assay:** Nano differential scanning fluorimetry (nanoDSF) technology was employed to measure the unfolding temperatures of the C4 domains using a Prometheus NT.48 machine (NanoTemper Technologies). C4 samples of wt and Y256I variant at both concentrations

of 1 mg/ml and 0.5 mg/ml in 20 mM Tris pH7.5, 150 mM NaCl were measured, and the ratio of tryptophan emission at 330 and 350 nm yields the protein unfolding curve. The unfolding temperature ( $T_m$ ) can be calculated from the inflection point of the unfolding curve.

**Docking of C4 domain with  $\alpha_{IIb}\beta_3$  Integrin:** An ensemble of 400 C4 conformations was assembled by taking snapshots every 5 ns from the 20 replicates. This was docked into the crystal structure of  $\alpha_{IIb}\beta_3$  Integrin 2VDQ<sup>1</sup> using the software HADDOCK2.2<sup>2</sup> with default parameters, except as noted in the Supplementary Table 2 containing summary statistics and ambiguous interaction restraint definitions.

32 **Supplementary Table 1. C<sub>β</sub> chemical shifts of Cysteines involved in disulfide bridges**

| S-S bridge | Cysteine residue | C <sub>β</sub> chemical shift (ppm)* |
|------------|------------------|--------------------------------------|
| <b>1</b>   | C2499            | 41.76                                |
|            | C2533            | 39.31                                |
| <b>2</b>   | C2528            | 37.55                                |
|            | C2570            | 39.22                                |
| <b>C4</b>  | C2565            | 47.20                                |
|            | C2574            | 48.58                                |
| <b>4</b>   | C2549            | 40.11                                |
|            | C2571            | 40.36                                |
| <b>V</b>   | C2557            | 36.29                                |
|            | C2576            | 40.21                                |

33 \*Mean chemical shift values for C<sub>β</sub> of disulphide bonded cysteines are  $40.7 \pm 3.8$  ppm and  $28.3$   
34  $\pm 2.2$  ppm for reduced cysteines<sup>26</sup>. Thus, all disulfide bonds are formed in the NMR sample  
35 environment.

36 **Supplementary Table 2. Summary of modified HADDOCK parameters and results.**

| Parameters                       |      |
|----------------------------------|------|
| Number of integrin conformations | 2    |
| Number of C4 conformations       | 400  |
| Number of rigid-body complexes   | 6000 |

|                                                                                                     |                                                                                                                                                                                                                                            |
|-----------------------------------------------------------------------------------------------------|--------------------------------------------------------------------------------------------------------------------------------------------------------------------------------------------------------------------------------------------|
| <b>Number chosen for refinement and analysis</b>                                                    | 200                                                                                                                                                                                                                                        |
| <b>Initial seed</b>                                                                                 | 1231                                                                                                                                                                                                                                       |
| <b>Ambiguous Interaction Restraints</b>                                                             |                                                                                                                                                                                                                                            |
| <b><math>\alpha_{\text{IIB}}\beta_3</math> Integrin</b>                                             | Active $\alpha_{\text{IIB}}$ : 160,189-190,192,224-226,231-232<br>Active $\beta_3$ : 121-124,213-218,220<br>Passive $\alpha_{\text{IIB}}$ : 156,159,161-162,191,223,227-230,262<br>Passive $\beta_3$ : 125-127,179-180,182,212,219,251-253 |
| <b>vWF C4</b>                                                                                       | Active (RGD-motif): 2507-2509<br>Passive: 2505-2506, 2510-2511                                                                                                                                                                             |
| <b>Summary Results</b>                                                                              |                                                                                                                                                                                                                                            |
| <b>Cluster size distribution with &gt;3 members according to fraction of common contacts at 5 Å</b> | (Threshold 0.5): 142,10, 6, 5<br>(Threshold 0.7): 77,8,7,6,6,5,4,4,4<br>(Threshold 0.9): 16,11                                                                                                                                             |
| <b>HADDOCK ranking of the lowest energy member in the largest cluster</b>                           | (Threshold 0.5): 3<br>(Threshold 0.7): 4 (depicted)<br>(Threshold 0.9): 9                                                                                                                                                                  |



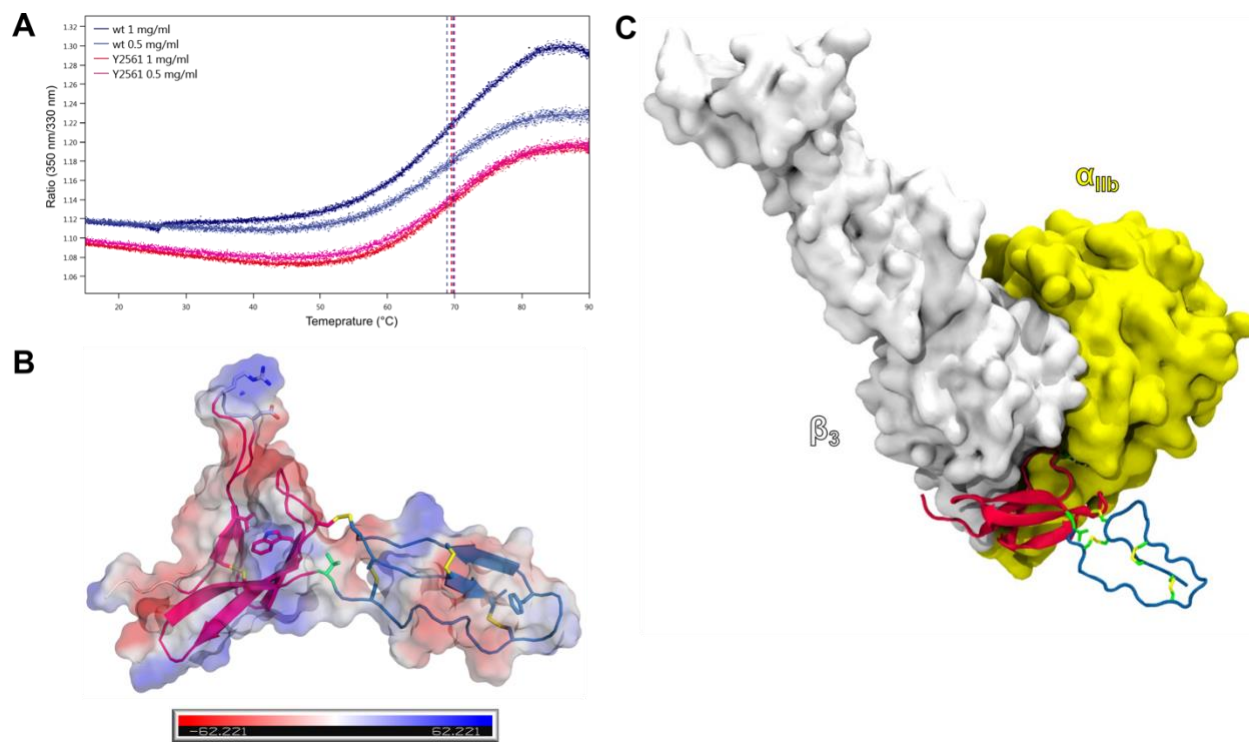

**Supplementary Figure 2. Thermal stability, surface charge of C4 structure, and platelet integrin binding model.** (A) Thermal stability of wt and Y2561 measured by nanoDSF. The unfolding temperatures are indicated by dashed lines at the inflection points (69.9 °C for wt 1 mg/ml; 69.1 °C for wt 0.5 mg/ml; 69.6 °C for Y2561 1 mg/ml; 70 °C for Y2561 0.5 mg/ml). (B) Surface representation of the C4 structure, colored according to the electrostatic potentials indicated by the color-code bar at the bottom. (C) Model of C4 binding to platelet integrin  $\alpha_{IIb}\beta_3$  by docking the C4 structure onto the fibrinogen bound  $\alpha_{IIb}\beta_3$  (PDB 2VDQ).  $\alpha_{IIb}\beta_3$  is shown as surface representation and C4 as ribbon diagram.

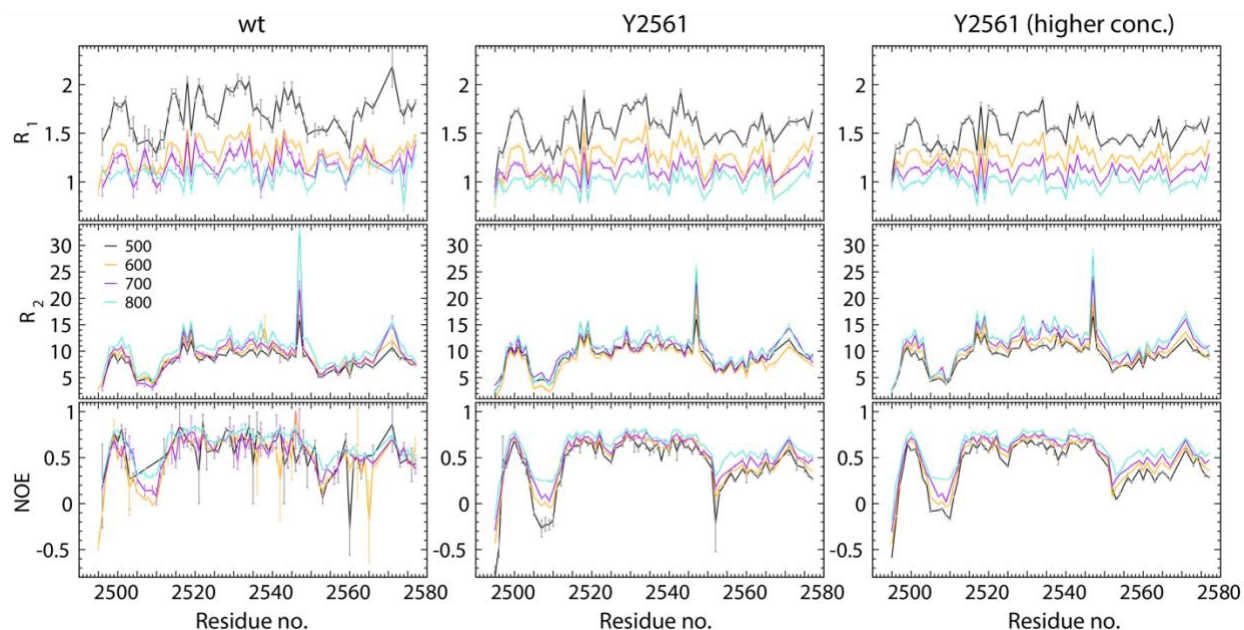

**Supplementary Figure 3.  $^{15}\text{N}$  relaxation data of the wt and Y2561 variant VWF C4 domains at four different frequencies: black, 500 MHz; magenta, 600 MHz; yellow, 700 MHz; cyan, 800 MHz.**

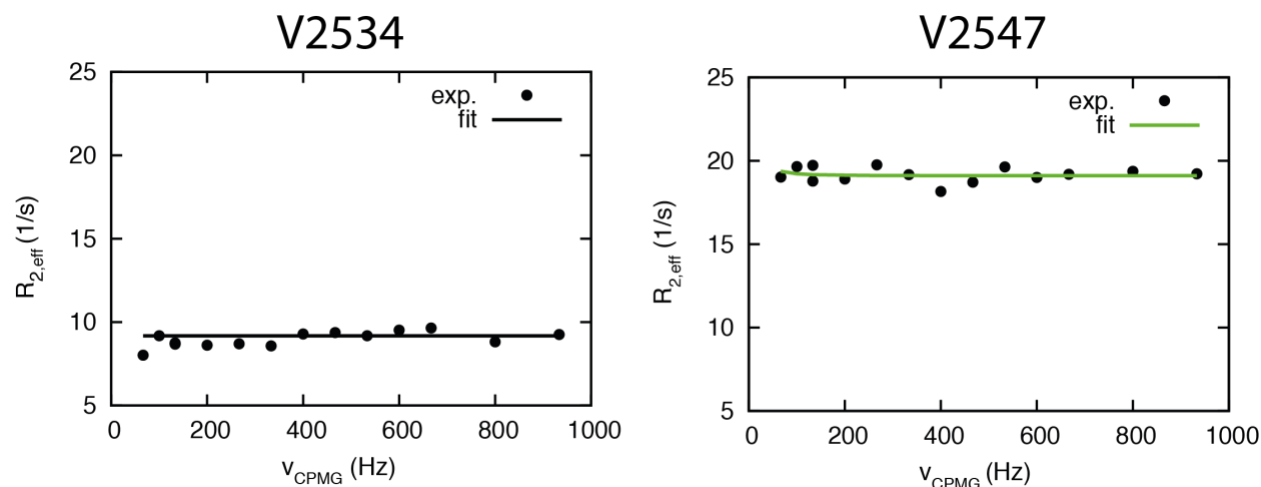

**Supplementary Figure 4. CPMG relaxation dispersion of wt VWF C4 domain.** Residues with no exchange contributions to  $R_2$  (left, e.g. V2534) exhibit flat dispersion profiles in CPMG experiments. V2547 with high exchange contributions exhibit flat profiles but retaining a high  $R_{2,\text{eff}}$ , demonstrating that dynamics for this residue are not in the CPMG (ms) time scale but faster.

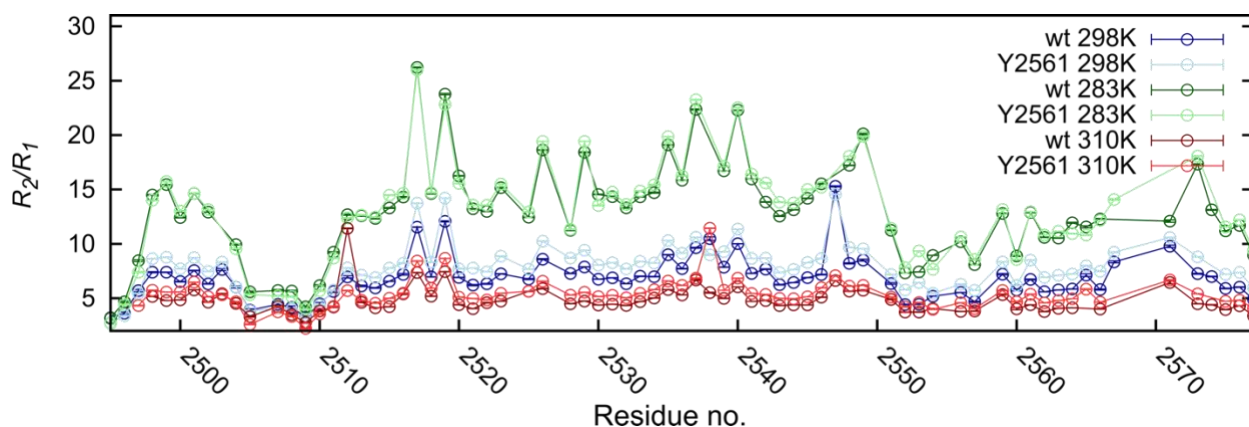

**Supplementary Figure 5.  $^{15}\text{N}$  relaxation of wt (strong colors) and Y2561 (pale colors) VWF C4 domain at three different temperatures: green, 283 K; blue, 298 K; red, 310 K. The data were obtained at 600 MHz.**

## References

1. Springer TA, Zhu J, Xiao T. Structural basis for distinctive recognition of fibrinogen  $\gamma\text{C}$  peptide by the platelet integrin  $\alpha\text{IIb}\beta 3$ . *J. Cell Biol.* 2008;182(4):791–800.
2. Dominguez C, Boelens R, Bonvin AMJJ. HADDOCK: A Protein–Protein Docking Approach Based on Biochemical or Biophysical Information. *J Am Chem Soc.* 2003;125(7):1731–1737.
